# Supplementary material for: Peptide-Mediated Targeted Delivery of Aloe-Emodin as Anticancer Drug
Source: MDPI journal article supplement (doi:10.3390/molecules27144615), 2022-07-19
Supplement: s1 [file s1]

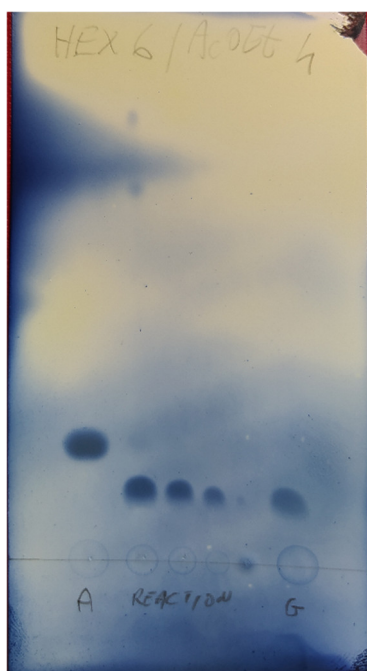

**Figure S1. TLC of synthesis steps of (3)** A: Aloe-emodin (2) ( $R_f=0.21$ ), Reaction: reaction mixture after 8 hours, G: monoglutaril derivative (3) ( $R_f=0.12$ ).

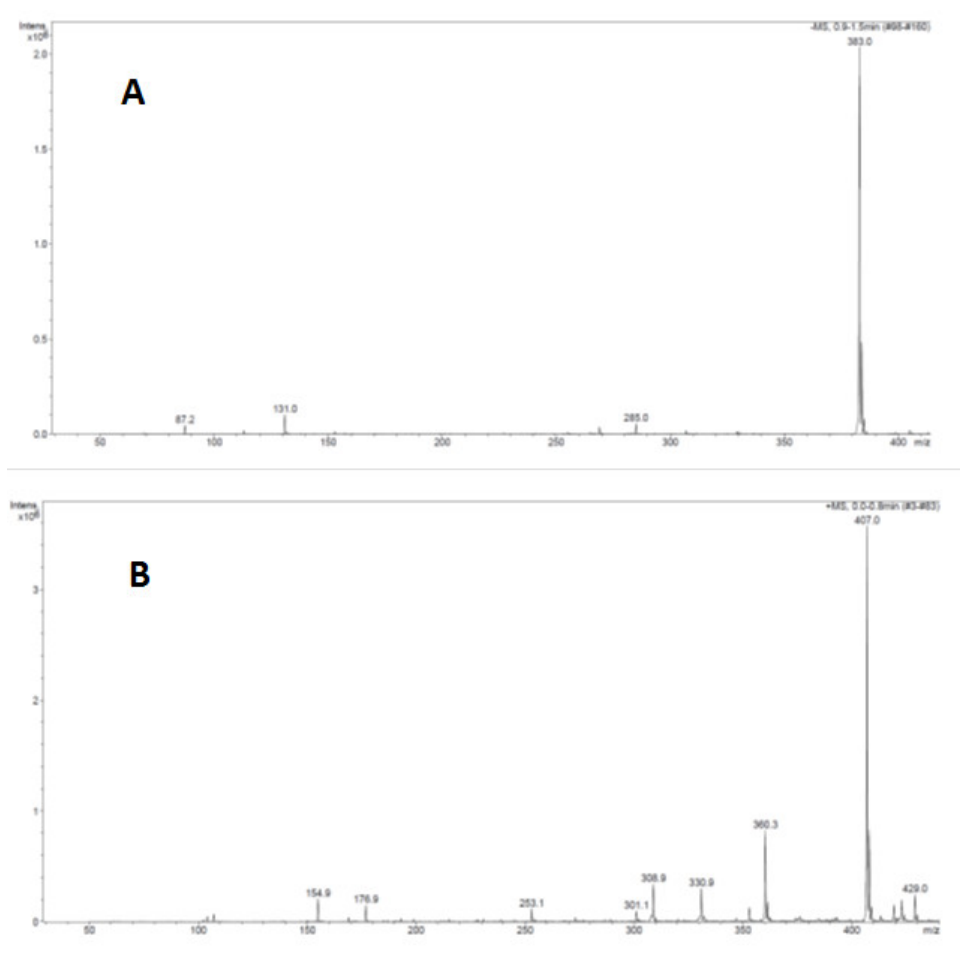

**Figure S2.** Mass spectra (ESI detector) of compound **3**: negative ions (**A**); positive ions (**B**).
